# Supplementary material
Source: PubMed Central journal article supplement (PMC4649650)
Supplement: supp_115.181099_FigureS1.pdf [file supp_115.181099_FigureS1.pdf]

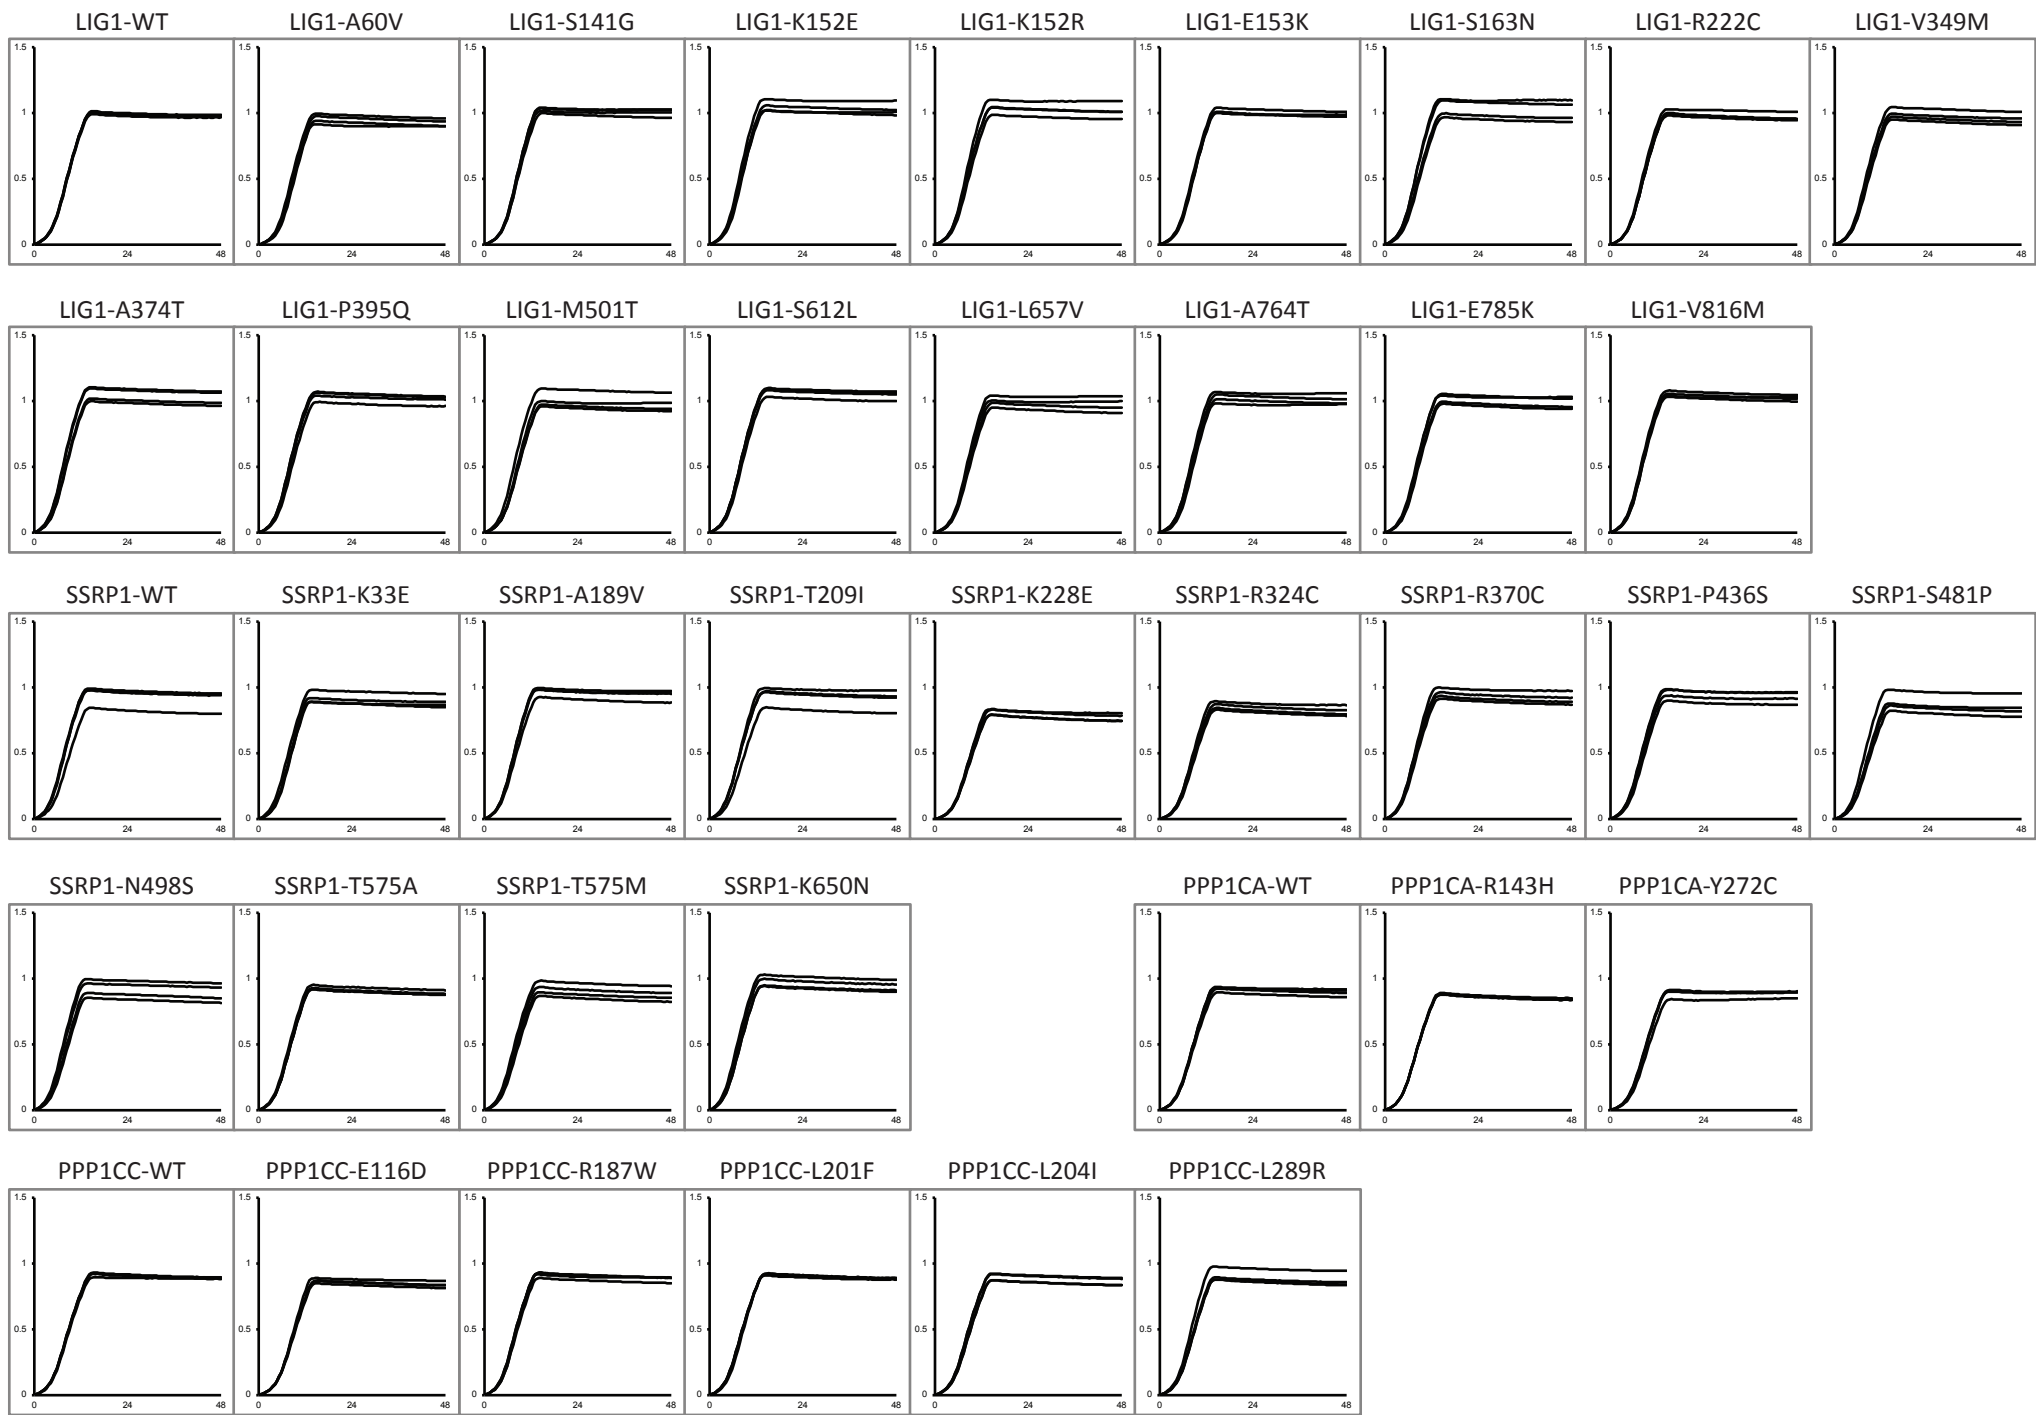

**Figure S1.** Growth curve replicates of wild-type yeast (BY4742) expressing indicated human cDNAs in  $-Leu$  media at  $30^{\circ}C$ . X-axis represents time in hours, while y-axis represents OD600 readings.
