# Supplementary material
Source: PubMed Central journal article supplement (PMC4649650)
Supplement: supp_115.181099_FigureS4.pdf [file supp_115.181099_FigureS4.pdf]

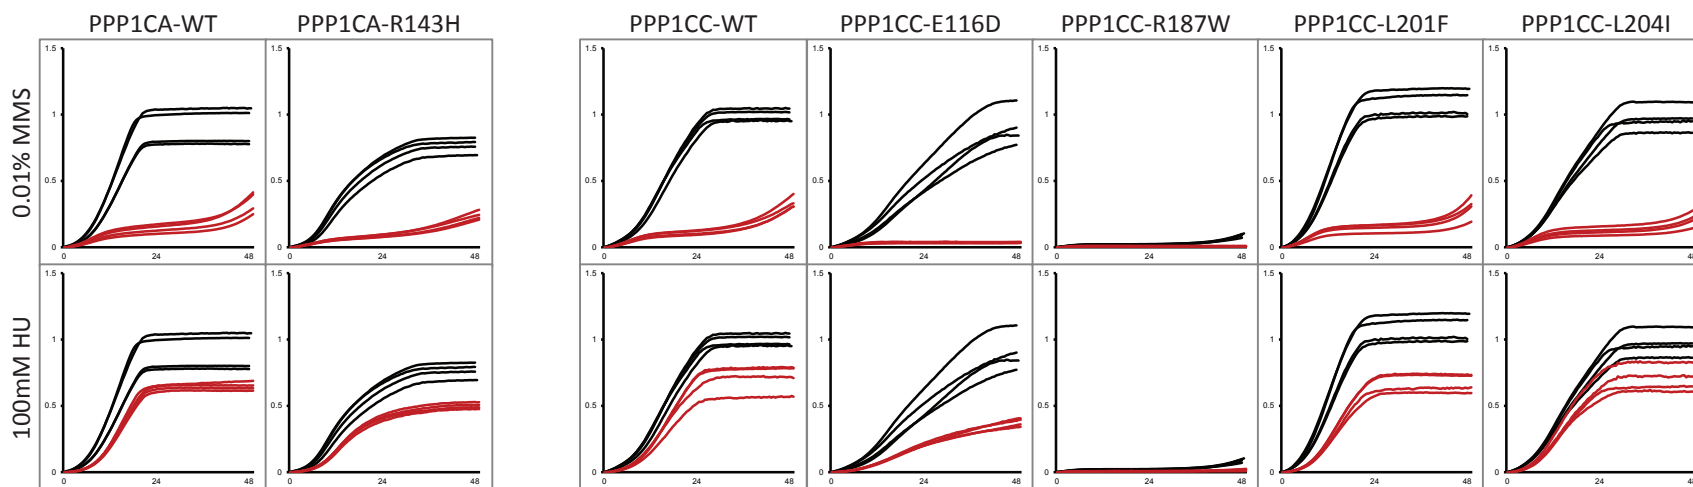

**Figure S4.** Growth curve replicates of *glc7Δ* yeast strains expressing indicated human cDNAs in –Leu media at 30°C. Black lines represent growth curve replicates in “No Drug” condition, while red lines represent growth curve replicates in indicated “Drug” condition. The “No Drug” and “Drug” replicates shown in each panel were grown on the same plate and diluted from the same mid-log phase culture. X-axis represents time in hours, while y-axis represents OD600 readings.
